# Supplementary figures and images for: Sonic hedgehog signaling regulates a novel epithelial progenitor domain of the hindbrain choroid plexus
Source: Oxford University Press journal article supplement (doi:10.1242/dev.033795), 2009-07-02

*Shh*

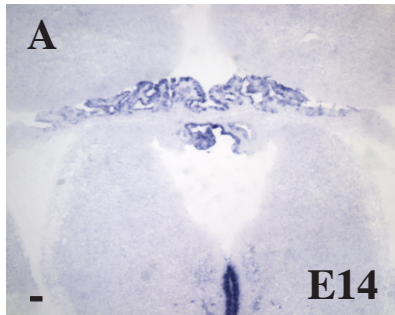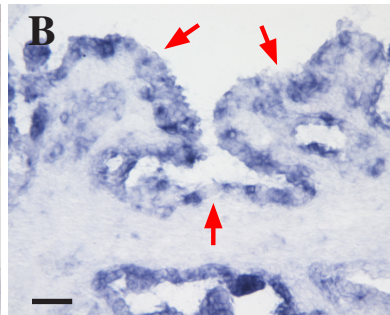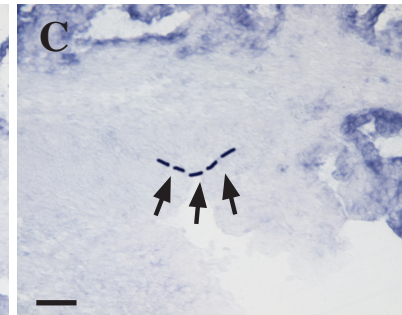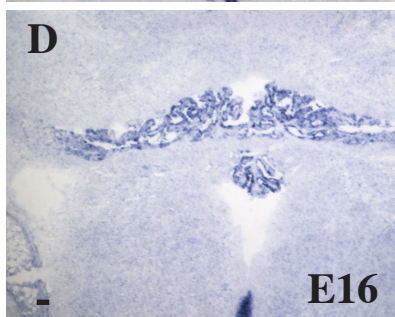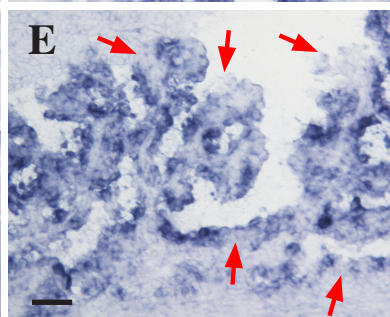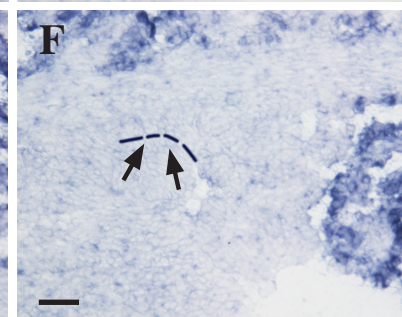

*Ptch1*

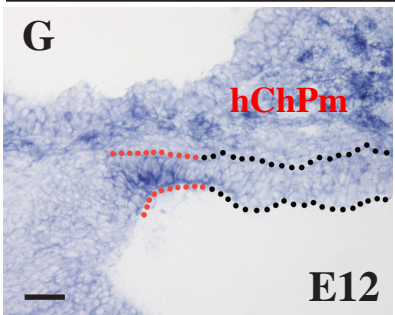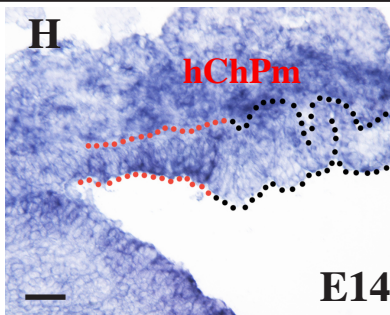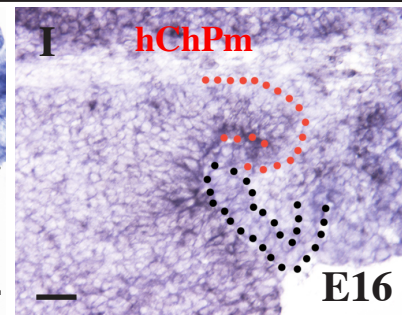

Supplement: dev033795-sup-033795-figs1.pdf [file dev033795-sup-033795-figs1.pdf]

*Ptch2*

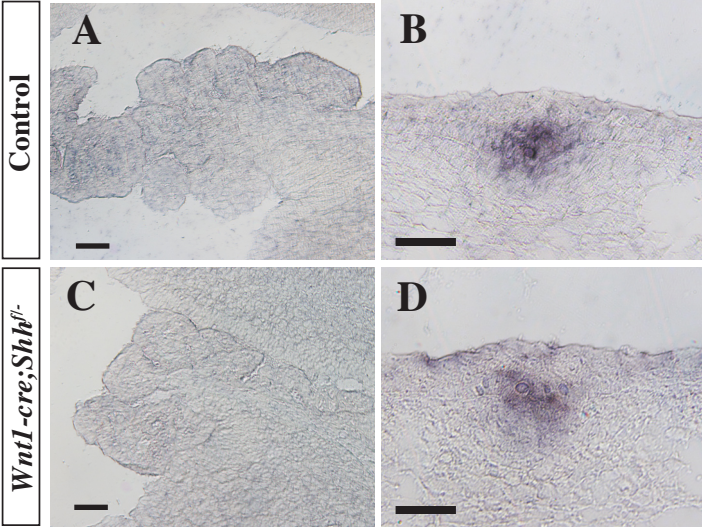

*Sprouty1*

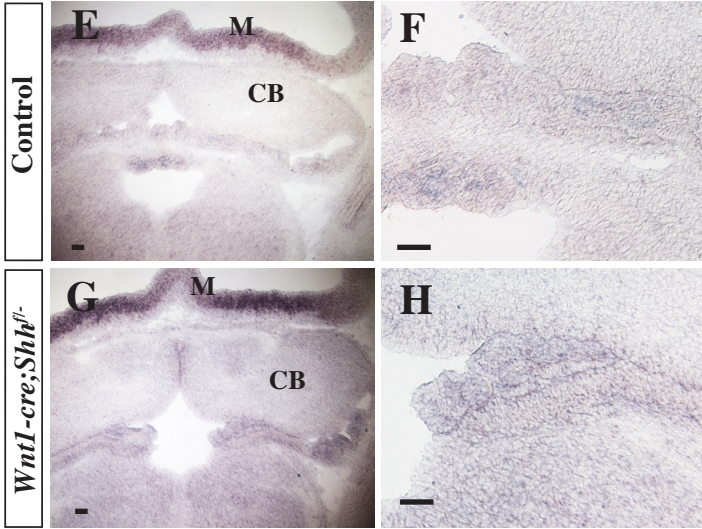

*Sprouty2*

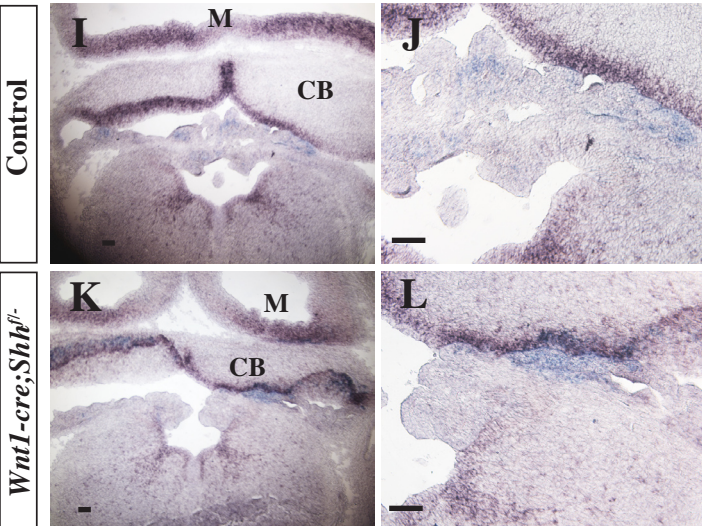

Supplement: dev033795-sup-033795-figs2.pdf [file dev033795-sup-033795-figs2.pdf]

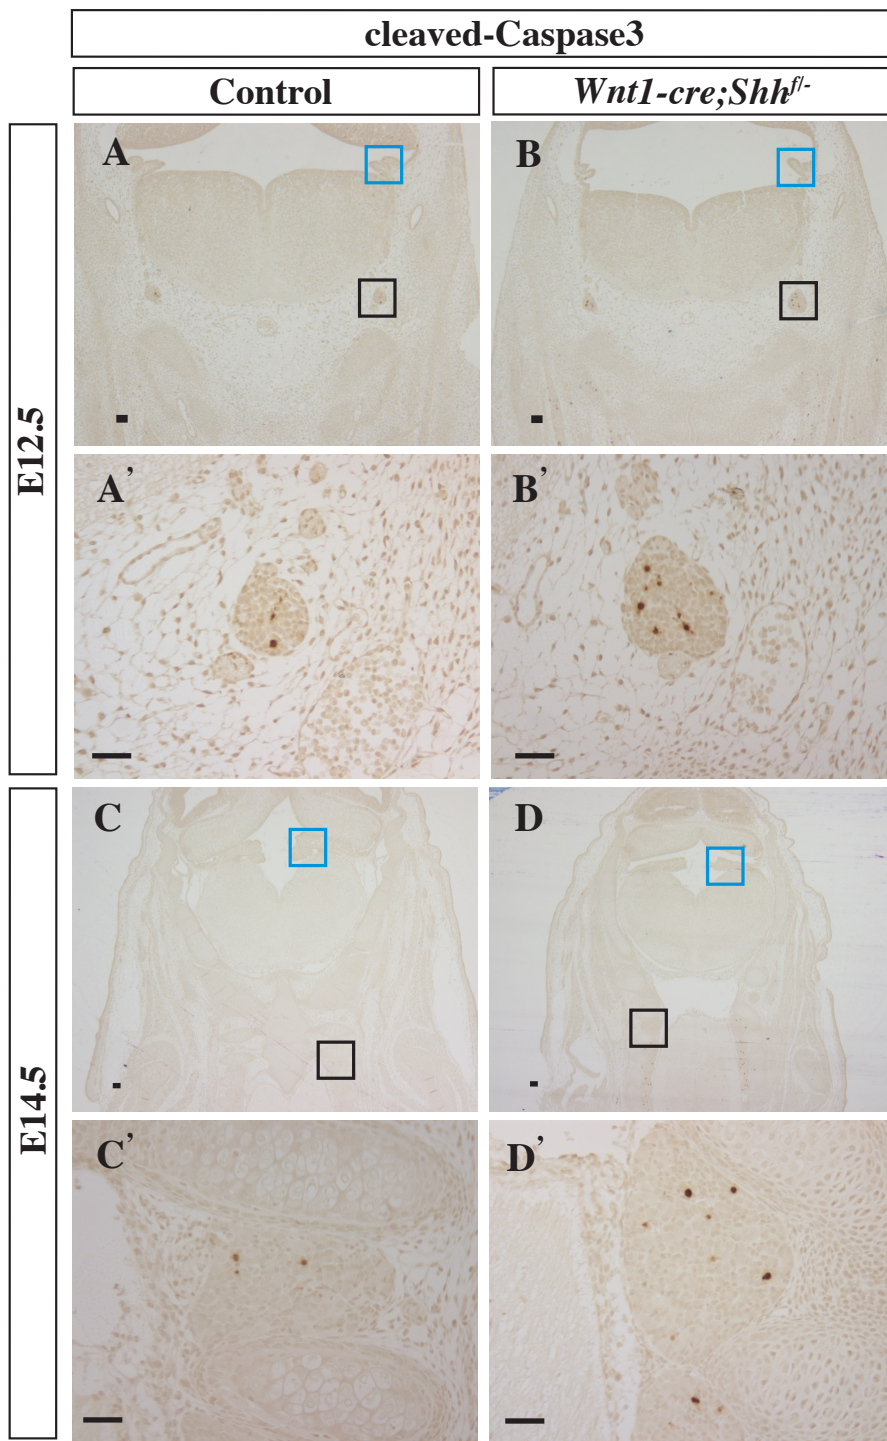

Supplement: dev033795-sup-033795-figs3.pdf [file dev033795-sup-033795-figs3.pdf]

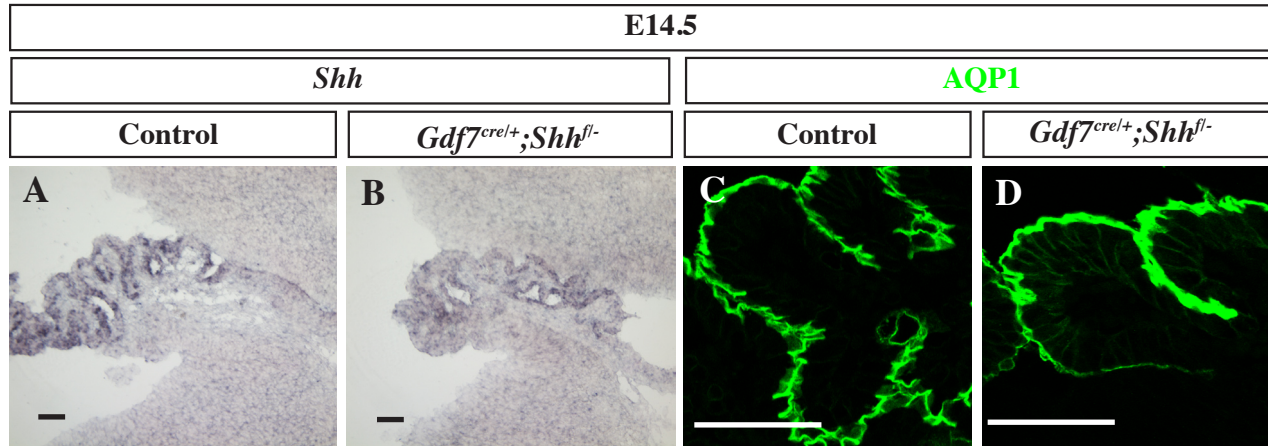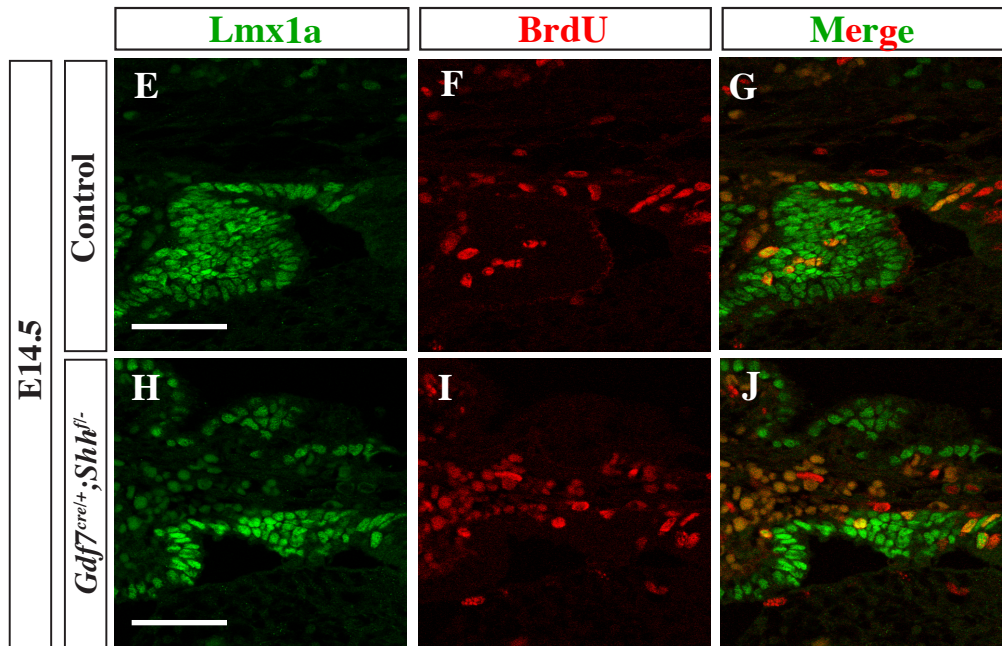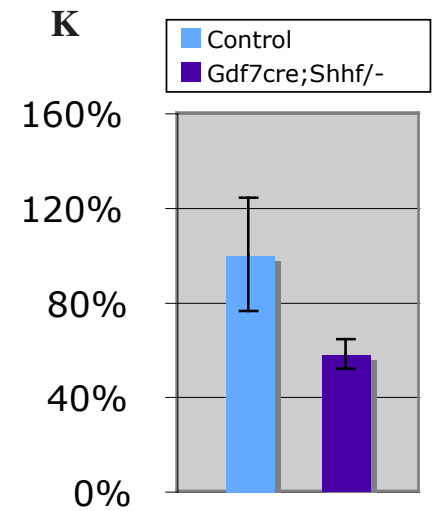

Supplement: dev033795-sup-033795-figs4.pdf [file dev033795-sup-033795-figs4.pdf]

*Gli1-creER<sup>T2</sup>;R-eYFP*

P0 (Tm at E15 and E17)

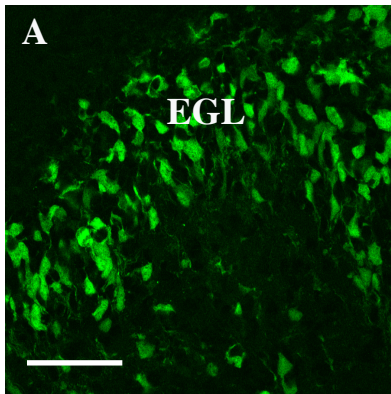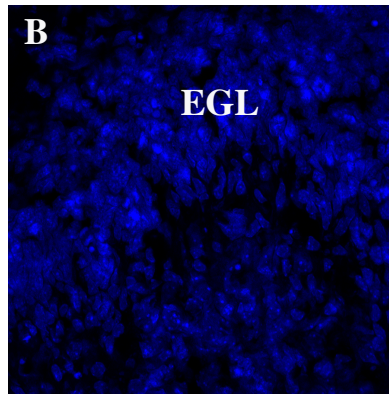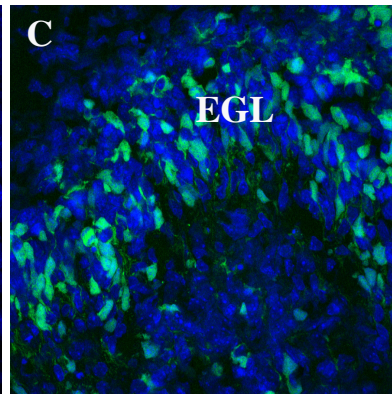

Supplement: dev033795-sup-033795-figs5.pdf [file dev033795-sup-033795-figs5.pdf]
